# Supplementary material
Source: publisher site journal article supplement (https://www.spandidos-publications.com/5618/downloadSupplementary)

Figure S1. Dose response of T $\beta$ 4 in a permeability assay. The hBMVECs permeability was performed using an Endothelial Trans-well Permeability Assay Kit. The cells were treated with three different doses of T $\beta$ 4, 250, 500 and 1,000 ng/ml. Data from this assay were expressed as absorption readings made at 450 nm, which were considered the relative permeability.

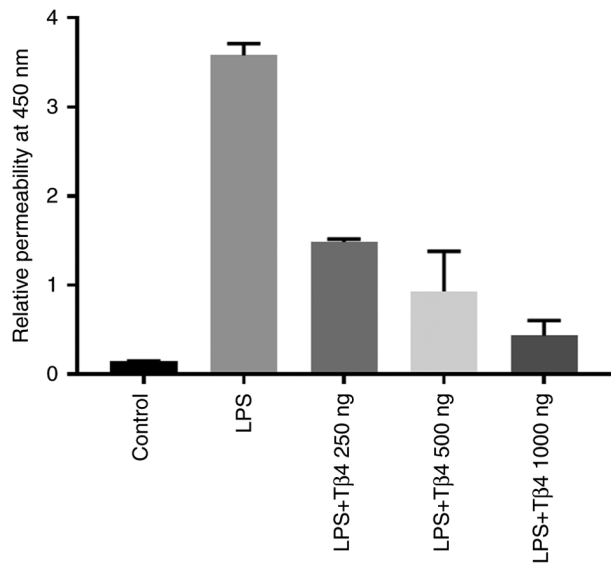

Figure S2. CD31-positivity in hBMVECs. The hBMVECs were seeded onto the 6-well attachment factor coated cover glass. Dual-staining immunofluorescence analysis of CD31 (red) is shown in the left panel. The middle panel shows DAPI (blue) staining for nucleus. The right panel is the merged image. hBMVECs, human microvascular endothelial cells.

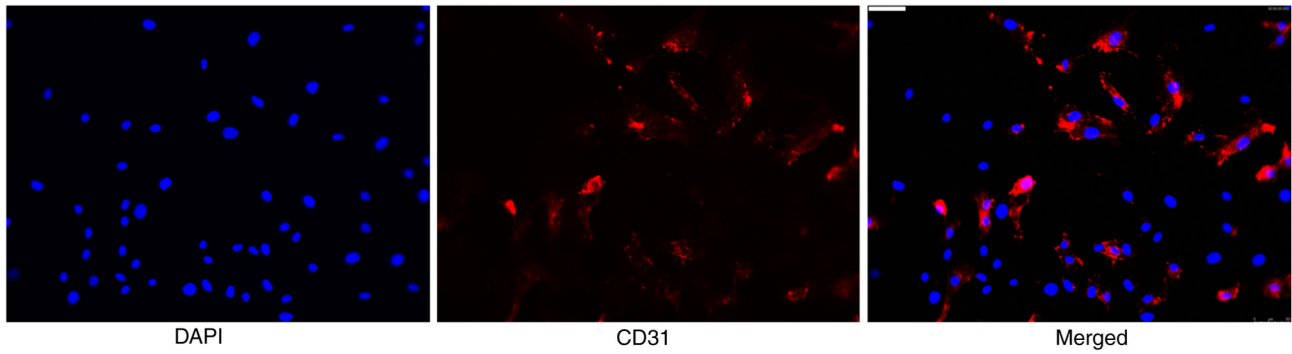

Supplement: Supplementary file 1 [file downloadSupplementary]
